# Supplementary figures and images for: pH/redox sequentially responsive nanoparticles with size shrinkage properties achieve deep tumor penetration and reversal of multidrug resistance
Source: Royal Society of Chemistry journal article supplement (doi:10.1039/d0bm00695e), 2020-01-01

Fig. S1

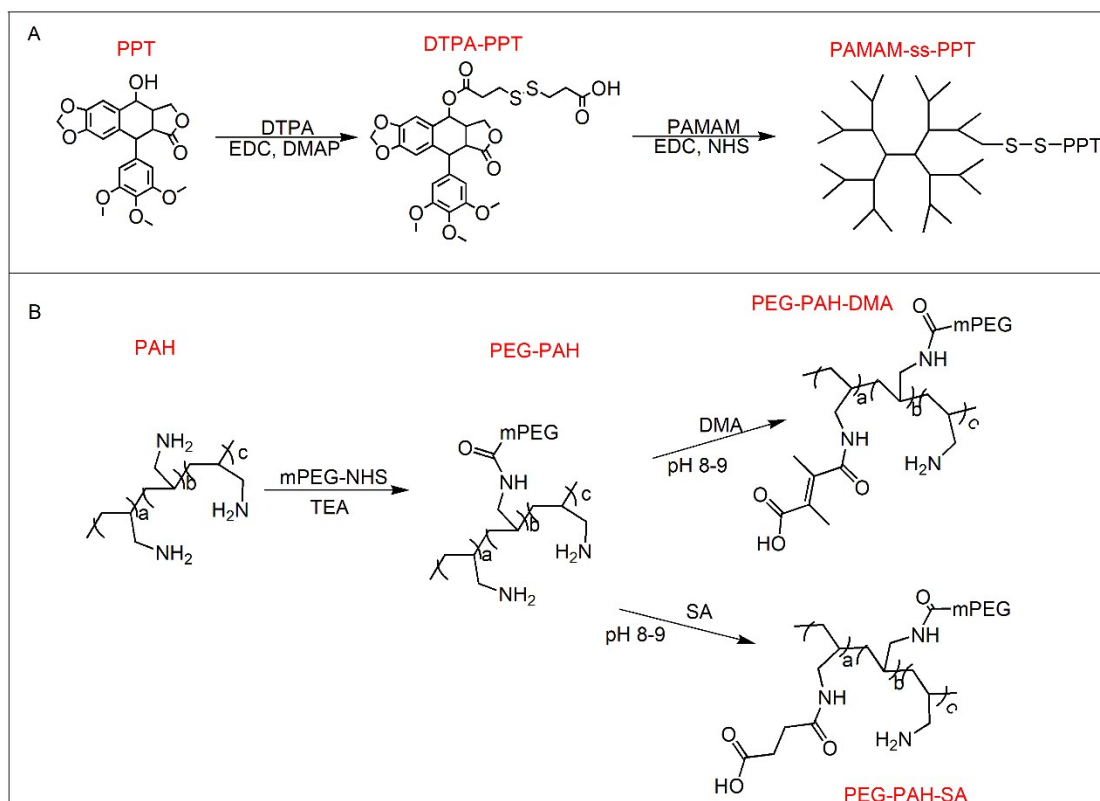

Fig. S2

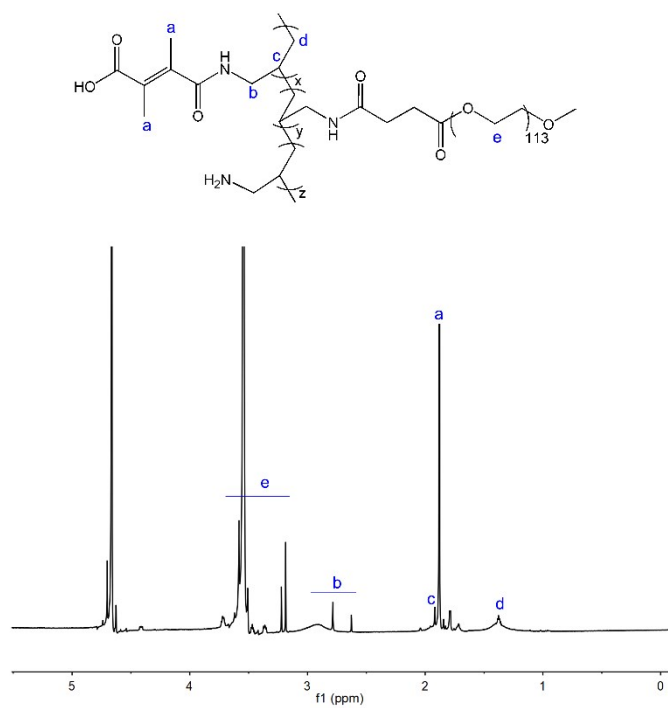

Fig. S3

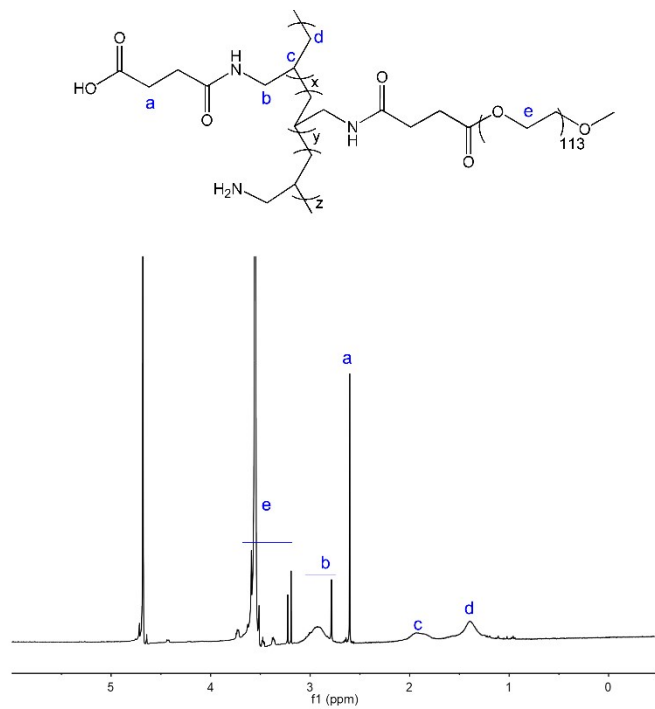

Fig. S4

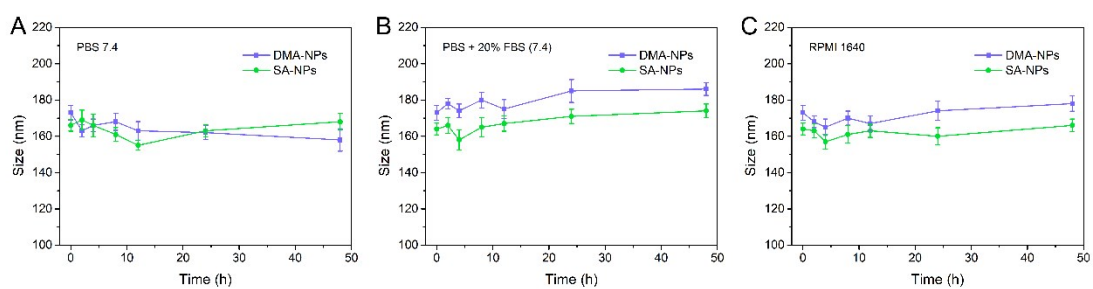

Fig. S5

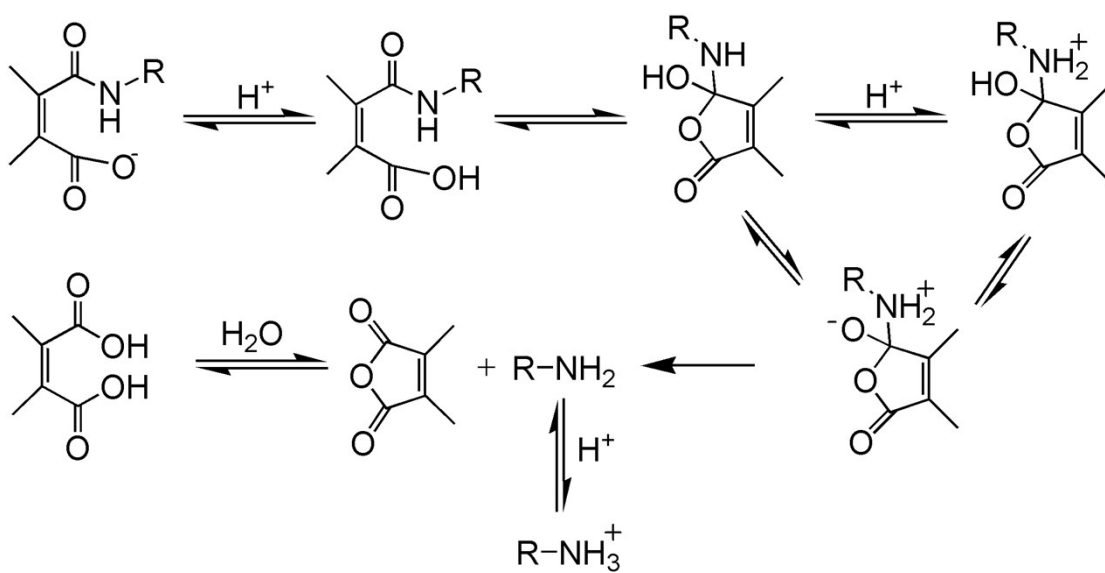

Fig. S6

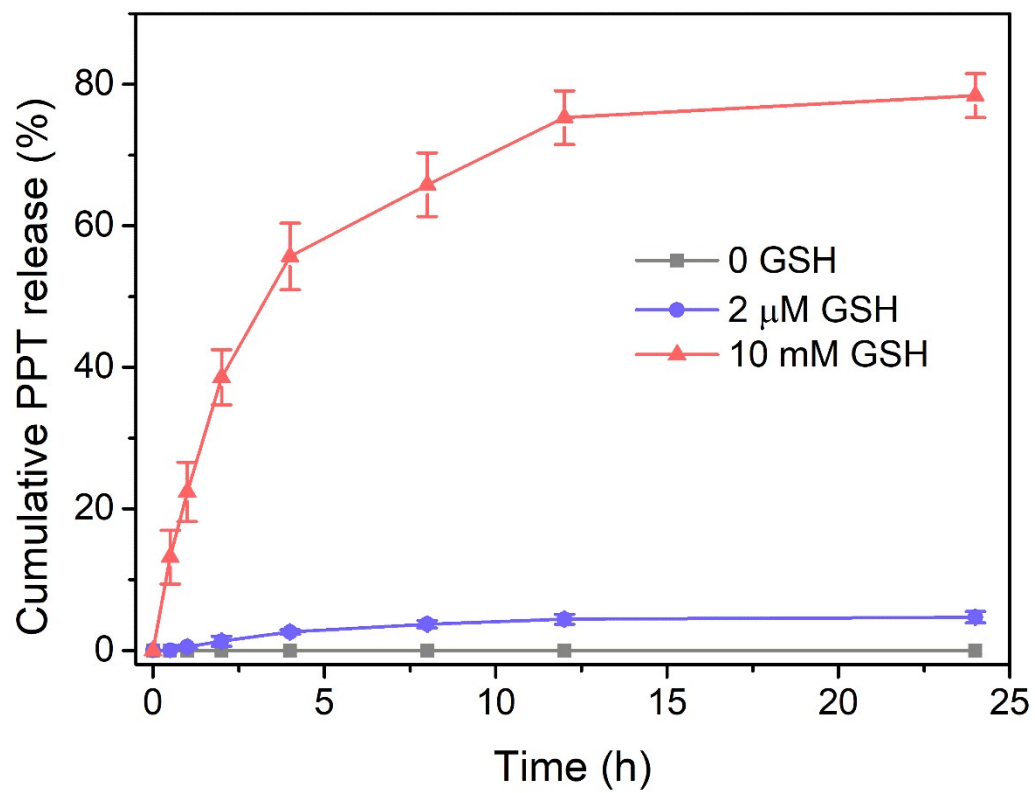

Fig. S7

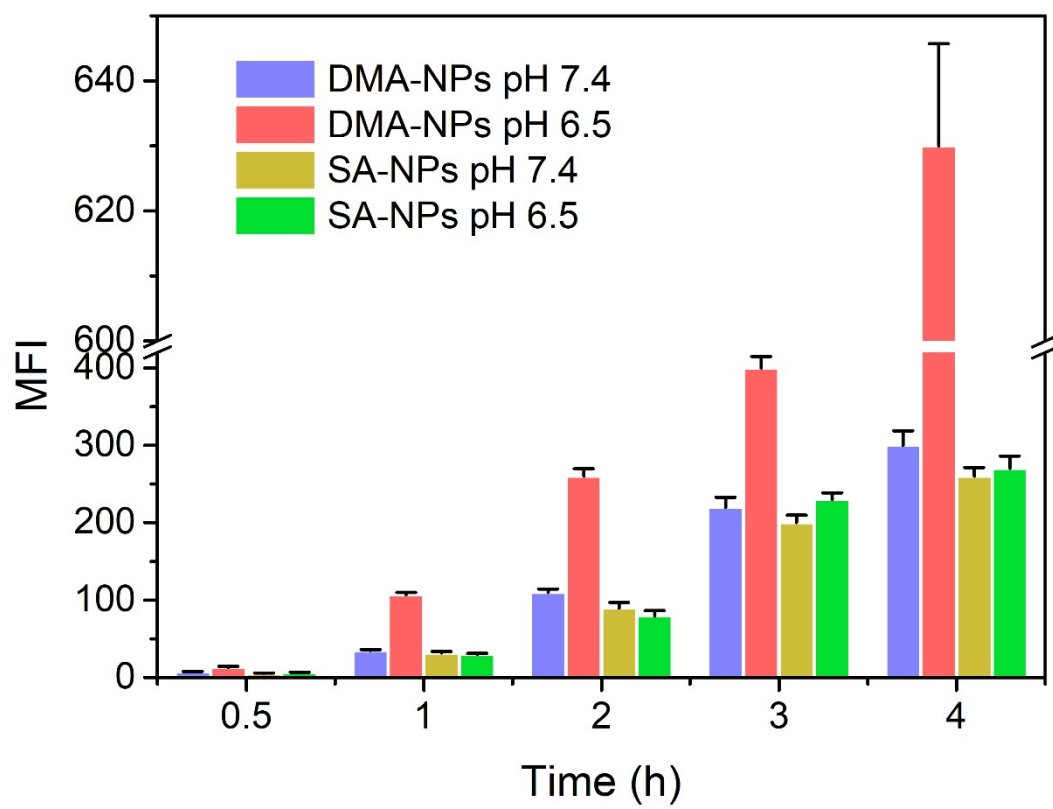

Fig. S8

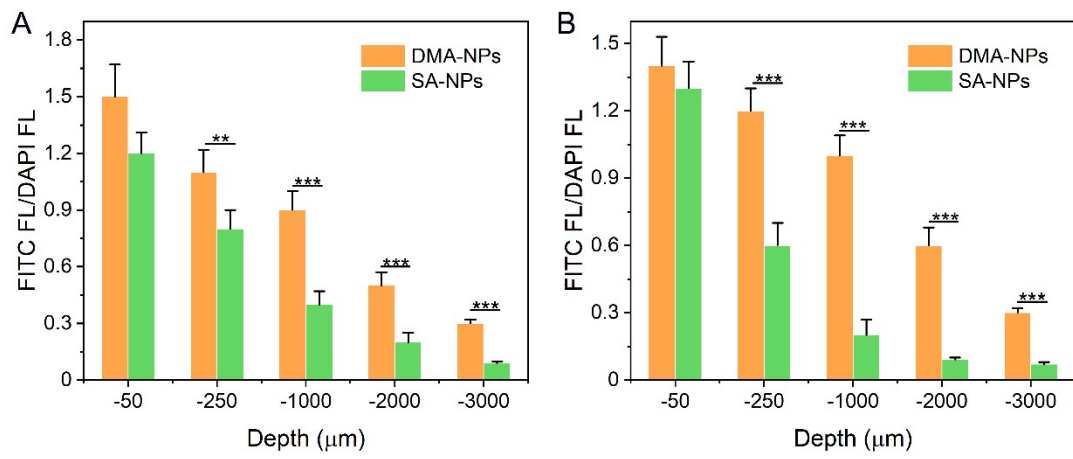

Fig. S9

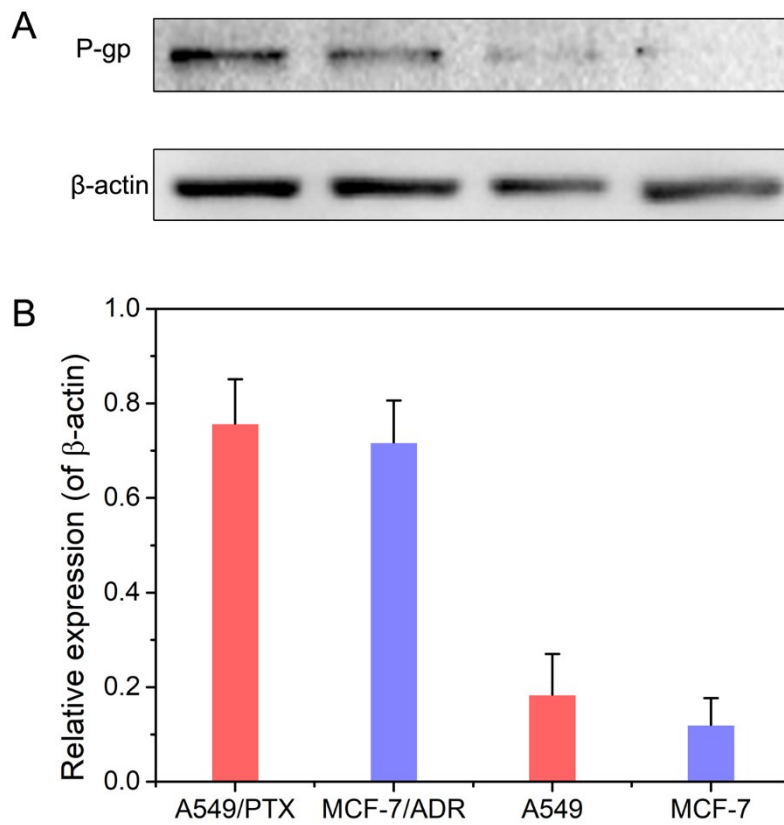

Fig. S10

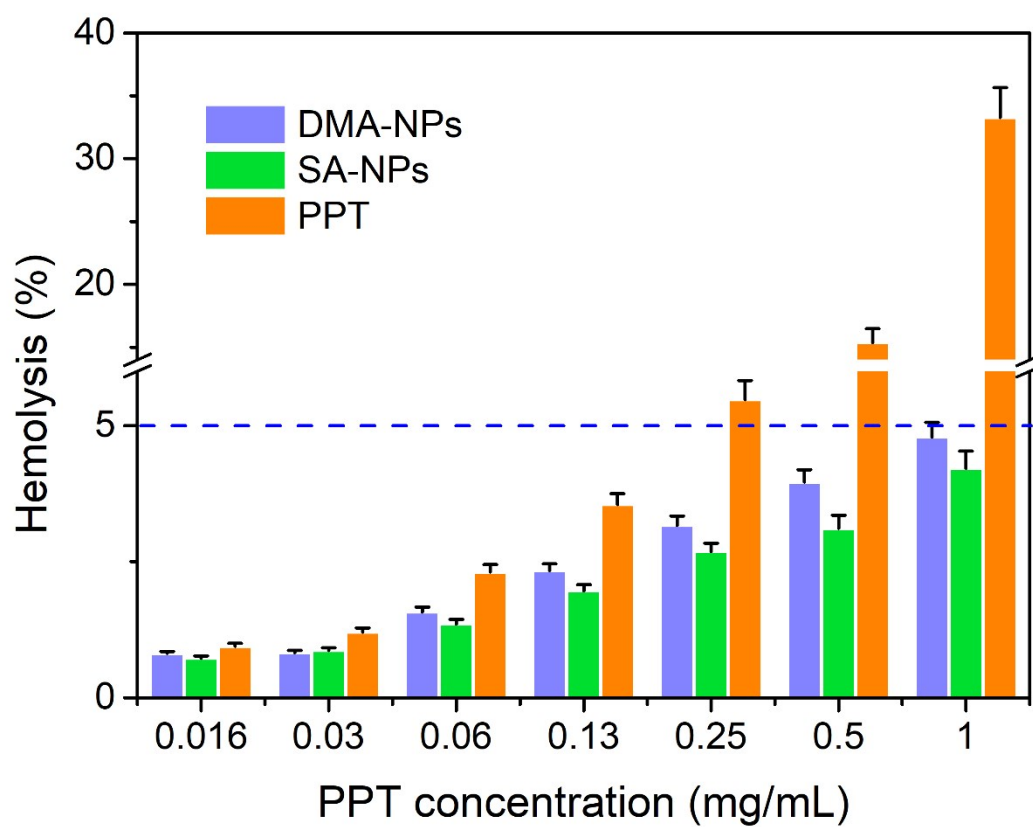

Supplement: d0bm00695e1.pdf [file d0bm00695e1.pdf]
